# Supplementary material for: Cl-Initiated oxidation of methacrolein under NOx-free conditions studied by VUV photoionization mass spectrometry
Source: Royal Society of Chemistry journal article supplement (doi:10.1039/d2cp02101c), 2022-01-01
Supplement: d2cp02101c1.pdf [file d2cp02101c1.pdf]

## Supplementary information

### Cl-initiated oxidation of methacrolein under NO<sub>x</sub>-free conditions studied by VUV photoionization mass spectrometry†

Xiaoxiao Lin,<sup>‡a</sup> Rongrong Hu,<sup>‡a</sup> Ziji Ma,<sup>a</sup> Hao Yue,<sup>a</sup> Zuoying Wen,<sup>a</sup> Cuihong Zhang,<sup>a,b</sup> Christa Fittschen,<sup>b</sup> Weijun Zhang,<sup>a,\*</sup> Xiaofeng Tang<sup>a,\*</sup>

<sup>a</sup> Laboratory of Atmospheric Physico-Chemistry, Anhui Institute of Optics and Fine Mechanics, HFIPS, Chinese Academy of Sciences, Hefei, 230031 Anhui, China

<sup>b</sup> University Lille, CNRS, UMR 8522, PC2A – Physicochimie des Processus de Combustion et de l'Atmosphère, F-59000 Lille, France

**Table S1.** Assignment of the mass peaks of the secondary products and their fragment ions

| m/z | molecular formula                                                 | assignment                                                                                                                                 |
|-----|-------------------------------------------------------------------|--------------------------------------------------------------------------------------------------------------------------------------------|
| 140 | C <sub>4</sub> H <sub>6</sub> O <sup>35</sup> Cl <sub>2</sub>     | C <sub>4</sub> H <sub>6</sub> OCl + Cl <sub>2</sub> → C <sub>4</sub> H <sub>6</sub> OCl <sub>2</sub> + Cl                                  |
| 142 | C <sub>4</sub> H <sub>6</sub> O <sup>35</sup> Cl <sup>37</sup> Cl |                                                                                                                                            |
| 144 | C <sub>4</sub> H <sub>6</sub> O <sup>37</sup> Cl <sub>2</sub>     |                                                                                                                                            |
| 111 | C <sub>3</sub> H <sub>5</sub> <sup>35</sup> Cl <sub>2</sub>       | C <sub>4</sub> H <sub>6</sub> OCl <sub>2</sub> <sup>+</sup> fragment:<br>C <sub>3</sub> H <sub>5</sub> Cl <sub>2</sub> <sup>+</sup> [-CHO] |
| 113 | C <sub>3</sub> H <sub>5</sub> <sup>35</sup> Cl <sup>37</sup> Cl   |                                                                                                                                            |
| 115 | C <sub>3</sub> H <sub>5</sub> <sup>37</sup> Cl <sub>2</sub>       |                                                                                                                                            |
| 76  | C <sub>3</sub> H <sub>5</sub> <sup>35</sup> Cl                    | C <sub>4</sub> H <sub>6</sub> OCl <sub>2</sub> <sup>+</sup> fragment:<br>C <sub>3</sub> H <sub>5</sub> Cl <sup>+</sup> [-CHOCl]            |
| 78  | C <sub>3</sub> H <sub>5</sub> <sup>37</sup> Cl                    |                                                                                                                                            |
| 104 | C <sub>4</sub> H <sub>5</sub> O <sup>35</sup> Cl                  | C <sub>4</sub> H <sub>5</sub> O + Cl <sub>2</sub> → C <sub>4</sub> H <sub>5</sub> OCl + Cl                                                 |
| 106 | C <sub>4</sub> H <sub>5</sub> O <sup>37</sup> Cl                  |                                                                                                                                            |

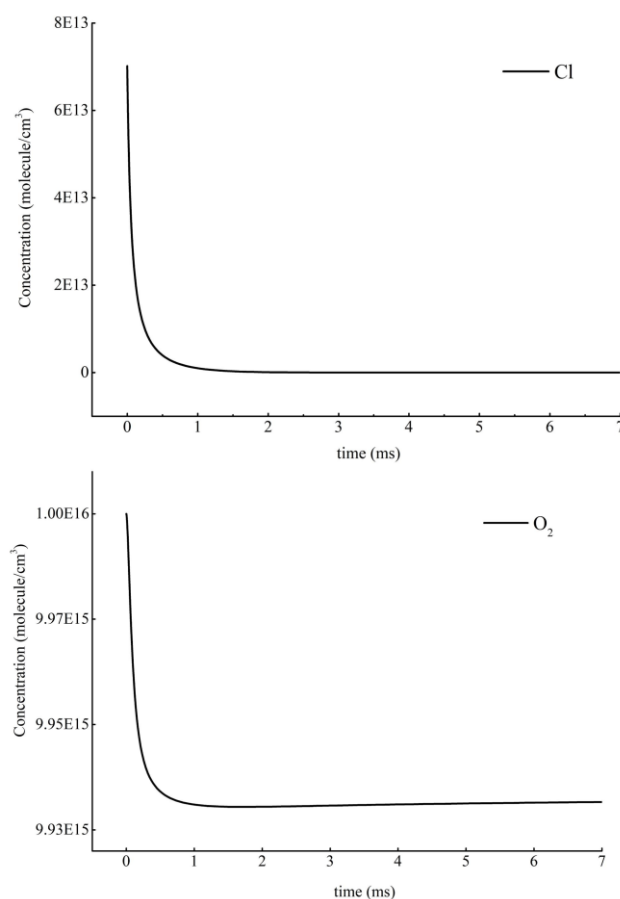

**Fig. S1.** The theoretical time behavior of reactants (O<sub>2</sub> and Cl atoms) in the Cl-initiated oxidation of MACR.

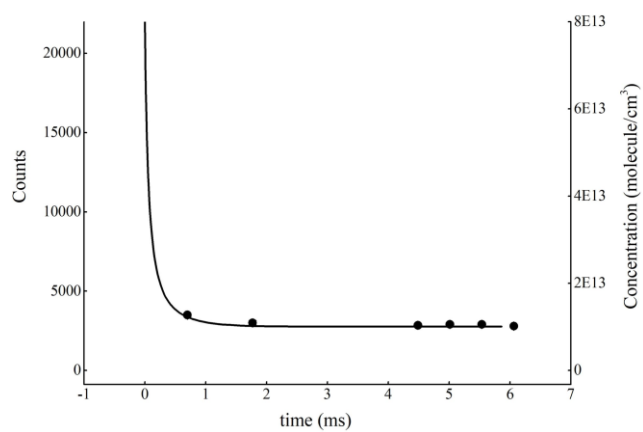

**Fig. S2.** The experimental (dots) and theoretical (lines) time behavior of reactant (MACR) in the Cl-initiated oxidation of MACR.
